# Supplementary material for: Efficient Genome Editing Using CRISPR/Cas9 Technology in Chicory
Source: PubMed Central journal article supplement (PMC6429391; doi:10.3390/ijms20051155), 2019-03-06
Supplement: ijms-20-01155-s001.pdf [file ijms-20-01155-s001.pdf]

ttaggatattcgggtgaggtgat**atg**tctctgtttgaaatgtctccgccattaactcaag  
 tggaaagtgtatagtaatgaatctttcaagcacacagatcacttcaaaagactgtttcaa | E1  
 catcacctcaggacaaaaagatgtactctcatttggatgctgtgatgccatgggtcacag  
 attgcaattcccaagtgccggttcttttacacccaaaatcaaagaagaatatctcccttt  
 aaaggtagcctttatatgcttctaattattgttcatagtatcaagttaatgaacaaatgta  
 tctctaataatcaaataggtagtttgtgttgactatccaagaccagatcttgacaacacc | E2  
 tctaatttcttggaaagtgttacttgtcttcaaccttcacaacttcccctcgccattt  
 aagccattgaagattgtaattgctgggtgcaggtaaaattaaaaaacttaatttttaatt  
 tatttttactaacttactttgattatctgttatcaaactaactttttcaaattttgca  
 ttttcaggtttggctggtttatcaactgcaaagtatttggctgatgcaggtcacaagcca | E3  
 attttggttagaagcaagagacgttcttgggtgaaaggtttataaactataaagtttctat  
 ctttattttcattttatctcaaatacatttctcttattggccttctaattattacatag  
 gtggcagcttggaaagatgatgatggagattggtagcagacaggtttacacatatctgt | E4  
 aagttttaacctttttattatccttcaagtttctaaaaatatagtccttttttggatacc  
  
 taatgctgaatgaactttttaatttttcttgaagt**ttggagcttacc**caaatacacagaatt  
 tgtttggagagtttaggaattaatgatagattgcaatggaaggaacattctatgatatttg  
 caatgccaaataagcctggagaatttagtcggtttgactttccagatgttttgctgcac | E5  
 cattaatggaatttttgctatattgaggaacaatgaaatgctgacgtggcctgaaaaag  
 taaaatttgcaattgggcttttgcctgcaatggttaggtggac**agg**cttatgttgaggccc  
 aagatggtttgagtgttcaagactggatgagaaaaaagatgtaaatgtaatcattaaa  
 gtaatatttttatctaaaacttttagataattagattactaatcaatctttttaattttt  
 tagggcatac**cagatcgagttactactgaggttt**ttattgcatgtcaaaggcattaaac  
  
 ttataaatccagatgaactttcaatgcagtgatttctcattgctctcaaccggtttctt  
 caggtaaaatttttattaataatccggaagaacaatatttttttttcaattattgttg  
 ttgattaataataaaataaatcaacaggagaaacatggttccaagatggcatttttagatg  
 gaagcccacccgaaagactttgccagccaattggtgaccatattgagtcacttgggtggc | E7  
 aagtcagactcaattcaagaatacaaaaaattgaattaaacaaagacggaactgtccgga  
 actttctactgaatgacgggaatgttctagaagctgatgcttatgtattcgccacccccg  
 gtatgtttcactatttatatttatctctatagtacatattcttgatttctaggggtccaaa  
 ttattgaattattttactttttttttgtgtataaaacagttgacatttttaagcttctt | E8  
 ttacctgaagaatggaaaccaattccatatttcaaaaagttagagaaactagtcggtgtt  
 ccggttataaacgttcatatatgggttagtcggtgacttcttgactttgactttgacttta  
 atcataaccgttttgtattaatctttaaaattattttcaggtttgataggaactgaaaa  
 acacatatgatcacctactattcagtaggtcgccctcttttgagtgtatatgctgacatgt  
 cagtgacatgtaaggaatattatgatccgaatcggatcaatggtggaattggtttttgcac  
 ctgcagaagaatggatttcaagaagtgacactgatattattgatgcaacaatgagtgaac | E9  
 tttcaaggctttttcctgatgaaatttcagcagatggaagtaaagcaaaaatcctgaaat  
 ataaagttgtttaaacaaccaagatctgtttataaaaccataccagattgtgaaccttgta  
 gaccactacaaagatctccaattgagggattttatttagctggtgattataactaaacaga  
 agtatttagcttcaatggaggggtgcggttttatctggaaagttttgtgcacaagctattg  
 taaaggtaagttttaagtatataaaagtaggttgttataattgttaattggttaatgatt  
 tttggattttgttttttaggattatgagttgcttgcacgtaagggagtggttgctga | E10  
 ggcaagccttgtg**taa**gttaataattaatggatgaattttaaggagctcttacaagttca

**Supplementary Figure S1.** *CiPDS* DNA sequence, sgRNA target sites and the primer sites for PCR amplification of the fifth exon. The exons are depicted in red and introns in dark. Blue nucleotides indicate the target sites, bold red nucleotides indicate the PAM sequences. Nucleotides highlighted in blue indicate start and stop codons, respectively.

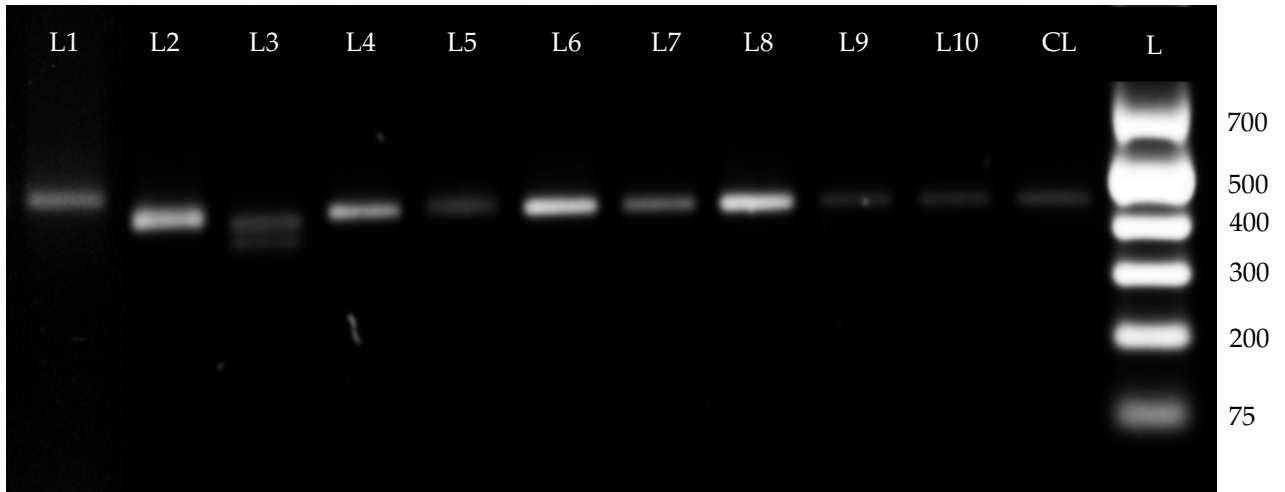

**Supplementary Figure S2:** DNA amplification of albino plant regenerated from hairy root lines by PCR with specific primer pair (E5-F and E5-R) surrounding the two target sites in the fifth exon of the *CiPDS*. L = Line, CL = Control Line (DNA from plant transformed with the wild type *A.rhizogenes* strain 15834), L = Ladder.

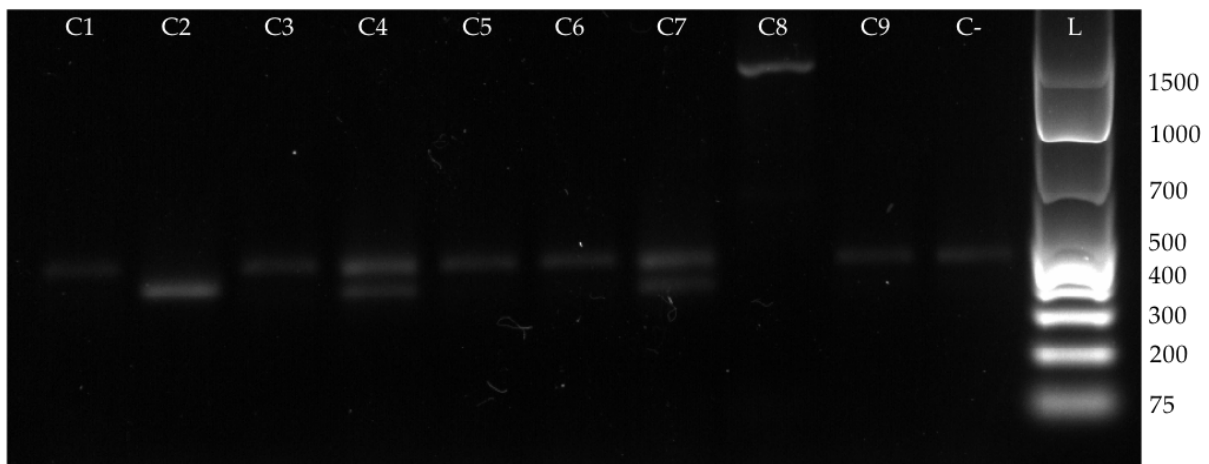

**Supplementary Figure S3:** Amplification by PCR of DNA extracted from albino plants regenerated from calli with specific primer pair (E5-F and E5-R) surrounding the two target sites in the fifth exon of the *CiPDS*. C = Callus, C- = DNA from plant regenerated from non-mutated callus, L = Ladder.

WT-KPGEFSRFDFFPDVLPAPLNGIFAILRNNEMLTWPEKVKFAIGLLPAMLGGQAYVEAQDGL...

L1.1 - KPGEFSRFDFFPDVLPAPLNGIFAILRNNENVA\*

L1.2 - KPGEFSRFDFFPDVLPAPLNGIFAILRNNEMLRGLKK\*

L2.1 - KPGEFSRFDFFPDVLPAPLNGIFAILRNNEMRRGLKK\*

L2.2 - KPGEFSRFDFFPDVLPAPLNGIFAILRNNEMLVA\*

L3.1 - KPGEFSRFDFFPDVLPAPLNGIFAILRNNEMLRGLKK\*

L3.2 - KPGEFSRFDFFPDVLPAPLNGIFAILRNNEMLTGLC\*

L4.1 - KPGEFSRFDFFPDVLPAPLNGIFAILRNNEMLTWPEKVKFAIGLLPAMLGVTGLC\*

L4.2 - KPGEFSRFDFFPDVLPAPLNGIFAILRNNEMHVA\*

L5.1 (R) - KPGEFSRFDFFPDVLPAPLNGIFAILRNNEMLTWPEKVKFAIGLLPAMLGGQAYVEAQDGL...

L5.2 (R) - KPGEFSRFDFFPDVLPAPLNGIFAILRNNEMLTWPEKVKFAIGLLPAMLGGTGLC\*

L5.1 (P) - KPGEFSRFDFFPDVLPAPLNGIFAILRNNEMLTWPEKVKFAIGLLPAMLGVTGLC\*

L5.2 (P) - KPGEFSRFDFFPDVLPAPLNGIFAILRNNETWPEKVKFAIGLLPAMLGVDRLMLRPKMV\*

L6.1 - KPGEFSRFDFFPDVLPAPLNGIFAILRNNEM-TWPEKVKFAIGLLPAMLGVTGLC\*

L6.2 - KPGEFSRFDFFPDVLPAPLNGIFAILRNNEMLRGLKK\*

L7.1 - KPGEFSRFDFFPDVLPAPLNGIFAILRNNEMRRGLKK\*

L7.2 - KPGEFSRFDFFPDVLPAPLNGIFAILRNNEMLVA\*

L8.1 - KPGEFSRFDFFPDVLPAPLNGIFAILRNNEMLTWPEKVKFAIGLLPAMLGDRMLMLRPKMV\*

L8.2 - KPGEFSRFDFFPDVLPAPLNGIFAILRNNEMLTWPEKVKFAIGLLPAMLGETGLC\*

L9.1 - KPGEFSRFDFFPDVLPAPLNGIFAILRNNEMLTWPEKVKFAIGLLPAMLGRTGLC\*

L9.2 - KPGEFSRFDFFPDVLPAPLNGIFAILRNNEMLRGLKK\*

L10.1 - KPGEFSRFDFFPDVLPAPLNGIFAILRNNEMLRGLKK\*

L10.2 - KPGEFSRFDFFPDVLPAPLNGIFAILRNNEMLRGLKK\*

**Supplementary Figure S4:** Predicted amino acid sequences of the CiPDS from the 10 albino hairy root lines and their shoots. Lx.x = Line x. allele x. For L5 (R) = Hairy root stage sequence, (P) = Plant stage sequence. In blue, the amino acids that differ from the wild type sequences. (-) shows the deleted amino acids and (\*) shows the end of the amino acid sequence.

WT- KPGEFSRFDFFPDVLPAPLNGIFAILRNNEMLTWPEKVKFAIGLLPAMLGGQAYVEAQDGL...

C1.1 - KPGEFSRFDFFPDVLPAPLNGIFAILRNNEMLTWPEKVKFAIGLLPAMLGVTGLC\*

C1.2 - KPGEFSRFDFFPDVLPAPLNGIFAILRNNEMLTWPEKVKFAIGLLPAMLGVTGLC\*

C2.1 - KPGEFSRFDFFPDVLPAPLNGIFAILRNNETGLC\*

C2.2 - KPGEFSRFDFFPDVLPAPLNGIFAILRNNETGLC\*

C3.1 - KPGEFSRFDFFPDVLPAPLNGIFAILRNNEMLRGLKK\*

C3.2 - KPGEFSRFDFFPDVLPAPLNGIFAILRNNEMLYVA\*

C4.1 - KPGEFSRFDFFPDVLPAPLNGIFAILRNNDVA\*

C4.2 - KPGEFSRFDFFPDVLPAPLNGIFAILRNK ----- -AYVEAQDGL...

C5.1 - KPGEFSRFDFFPDVLPAPLNGIFAILRNNEMLTWPEKVKFAIGLLPAMLGTGLC\*

C5.2 - KPGEFSRFDFFPDVLPAPLNGIFAILRNNEMLTWPEKVKFAIGLLPAMLGETGLC\*

C6.1 - KPGEFSRFDFFPDVLPAPLNGIFAILRNNEMLRGLKK\*

C6.2 - KPGEFSRFDFFPDVLPAPLNGIFAILRNNEMLTWPEKVKFAIGLLPAMLGGTGLC\*

C7.1 - KPGEFSRFDFFPDVLPAPLNGIFAILRNNERGLKK\*

C7.2 - KPGEFSRFDFFPDVLPAPLNGIFAILRNK ----- -AYVEAQDGL...

C8.1 - KPGEFSRFDFFPDVLPAPLNGIFAILRNNEMLRGLKK\*

C8.2 - KPGEFSRFDFFPDVLPAPLNGIFAILRNNEMLRGLKK\*

C9.1 - KPGEFSRFDFFPDVLPAPLNGIFAILRNNEMLTWPEKVKFAIGLLPAMLGGTGLC\*

C9.2 - KPGEFSRFDFFPDVLPAPLNGIFAILRNNEMLTWPEKVKFAIGLLPAMLGGTGLC\*

**Supplementary Figure S5:** Predicted amino acid sequence of the CiPDS from the 9 albino calli and their shoots. Cx.x = Callus x. allele x. In blue, the amino acids that differ from the wild type sequences, (-) shows the deleted amino acids and (\*) shows the end of the amino acid sequence.

(TGAGTAGTTCCAGATAAGGGAATTAGGGTTCTTATAGGGTTTCGCTCATGTGTTGAGCATATAAGAAACCCTTAGTATGTATT  
 TGTATTTGAAAATACTTCTATCAATAAAATTTCTAATTCCTAAAAACAAAATCCAGTGACGCGGCCGCATAAGGCCGCCATCTC  
 GATGACGATGTTCTCAGGCTGTGACGACCCGTAAGCGGCTGGGTTGCTGCCGGCCCTGCAATGGCACTGGAACCCCAAGC  
 CCGAGGAATCGGCGTGAGCGGTGCAAACCATCCGGCCCGGTACAAATCGGCGCGGCGCTGGGTGATGACCTGGTGGAGAA  
 GTTGAAGGCCGCGCAGGCCGCCAGCGGCAACGCATCGAGGCAGAAGCACGCCCGGTGAATCGTGGCAAGCGGCCGCTGA  
 TCGAATTGCGCAACCGGAACCCGTACATTGGGAA(nnn...nnn)TTCCAATGTACGTGCTATCCACAGGAAAGAGAAGCTTTTCG  
 ACCTTTTTCCCTGCTAGGGCAATTTGCCCTAGCATCTGCTCCGTACATTAGGAACCGGCGGATGCTTCGCCCTCGATCAGGTTG  
 CGGTAGCGCATGACTAGGATCGGGCCAGC)

**Supplementary Figure S6:** Partial sequence of the DNA fragments inserted at the target 2 site of the C8 mutant. The insert is composed of more than 6 fragments (depicted in red, black, green, purple or orange) of the pYLCRISPR-sgRNA1-sgRNA2. (nnn...nnn) is a part of the fragment, which was not sequenced.

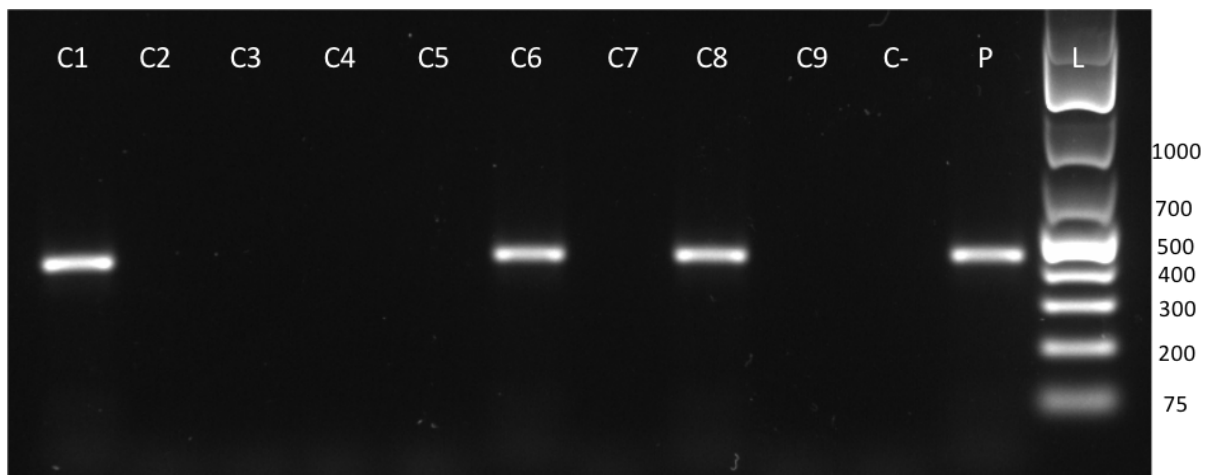

**Supplementary Figure S7:** DNA amplification of albino plants regenerated from calli by PCR with specific primer pair (C9-F and C9-R) hybridizing in Cas9 gene. C = Callus, C- = DNA from plant regenerated from non-mutated callus, P = Plasmid pYLCRISPR-sgRNA1-sgRNA2 DNA, L = Ladder.

GGAATTCGGCTGGTCTCTCTCGAAAGAACCAACCTGTTTTCATAGCTCTGTTGACTGATAGAGTTTTGATA  
 TGTTCAACTTTTCAGGTAAAACCAAGAGGATAGTAAAATTGAGGGTTAGCTTACAAATATTTATCGGTTCCCTA  
 GCTATCGTAATGCCATGGCTTCCACATCGCTCATTGGAGCAACATCGCCATGCTTTATATAGCCTCGCCT  
 CCAACCATTTATCGATGTCTTCgAGTTAGCTCACTCATTAGGCACCCAGGCTTTACACTTTATGCTTCCG  
 GCTCGTATGTTGTGTGGAATTGTGAGCGGATAACAATTTACACAAGAAACAGCTATGACCATGATTACGC  
 CAAGCTATTTAGGTGACACTATAGAATACTCAAGCTATGCATCAAGCTCAATGGGTCTAGTCTGTAGATA  
 CCATCACACTGGCGACCGCTCGAACATCAGTTAAGGTTTACACCTATAAAAGAGAGAGCCGTTATCGTC  
 TGTTTGTGGATGTACAGAGTGATATTATTGACACGCCGGGGCGACGGATGGTGTATCCCCCTGGCCAGTG  
 CACGTCTGCTGTCAGATAAAGTCTCCCGTGAACCTTACCCGGTGGTGCATATCGGGGATGGAAGCTGGC  
 GCATGATGACCACCGATATGGCCAGTGTGCCTGTCTCCGTTATCGGGGAAGAAGTGGCTGATCTCAGCC  
 ACCGCGAAAATGACATCAAAAACGCCATTAACCTGATGTTCTGGGGAATATAAATGTCAGGCCTGAATGG  
 CGAATGGACGCGCCCTGTAGCGGCGCATTAAAGCGCGCGGGTGAGCGTgGAAGACTAGTTTTAGAGCTA  
 GAAATAGCAAGTTAAAATAAGGCTAGTCCGTTATCAACTTGAAAAAGTGGCACCCGAGTCGGTGCTTTTTT  
 TGAGACCGACCGGATCCC

**Supplementary Figure S8:** Sequence of the cassette “CiU6-PlacZ ccdB-sgRNAscaffold” harboring by the plasmid pKanCiU6-1p-sgRNAscaffold. The CiU6-1p, the selectable marker PlacZ-*ccdB* and the sgRNA scaffold are written in blue, yellow and green respectively. In red is highlighted the *BbsI* recognition site which achieves a cleavage on the left side (shown in underlined and bold). Note that the G present in the 4 nucleotides of the cutting site, is the transcription initiator. Highlighted in blue is the *BbsI* recognition site which achieves a cleavage on the right side (shown in underlined and bold).
